# Supplementary material
Source: publisher figshare collection journal article supplement (https://frontiersin.figshare.com/ndownloader/files/35152402)
Supplement: Supplementary file 1 [file 35152402]

**Table S5**. Molecular markers comparison results of strain CNS00097 with *P. simulans* and *P. hallegraeffii*.

| Species | 18S rDNA | | | 28S rDNA D1-D3 | | | ITS1-5.8S-ITS2 | | | ITS2 | | | Reference |
| --- | --- | --- | --- | --- | --- | --- | --- | --- | --- | --- | --- | --- | --- |
| Query Cover | PID | Accession | Query Cover | PID | Accession | Query Cover | PID | Accession | Query Cover | PID | Accession |
| *P. simulans* | 94% | 99.76% | OM807226 | 97% | 99.87% | MF374776 | 88% | 95.03% | MF374771 | 100% | 93.45% | MF374771 | (Li et al., 2017b) |
| *P. hallegraeffii* | - | - |  | 79% | 96.81% | MF044022 | 90% | 99.86% | MF044023 | 100% | 99.66% | MF044023 | (Ajani et al., 2018) |
